# Supplementary material
Source: MDPI journal article supplement (https://www.mdpi.com/2077-0472/12/3/413)
Supplement: s1 [file s1]

## Supplementary information

Table S1. Primer information

| No. | Target         | Primer             | Sequence (5'-3')                                          | Expected amplicon size (bp) | Reference                                                                      |
|-----|----------------|--------------------|-----------------------------------------------------------|-----------------------------|--------------------------------------------------------------------------------|
| 1   | 3272           | 3272-F<br>3272-R   | (FAM)CTGGCCGATAAACTGACCAT<br>CCAAACGTAAAACGGCTTGT         | 221                         | Ministry of Agriculture<br>Announcement<br>No. 2031-13-2013                    |
| 2   | 4114           | 4114-F<br>4114-R   | (FAM)GCCTCTTGCTCTTCAGGATGA<br>CGCAGTGAGAACCGTATATCCA      | 296                         | Ministry of Agriculture<br>Announcement<br>No. 2630-7-2017                     |
| 3   | 5307           | 5307-F<br>5307-R   | (ROX)GTGTTATTAAGTTGTCTAAGCGTC<br>GACCAAAAGAGTTCTAGTGTAGTG | 250                         | Ministry of Agriculture<br>Announcement<br>No. 2630-4-2017                     |
| 4   | 59122          | 59122-F<br>59122-R | (FAM)CGTCCGCAATGTGTTATTAAG<br>TGACCAAGTGTCCTTCTGAC        | 273                         | Ministry of Agriculture<br>Announcement<br>No. 1485-9-2010                     |
| 5   | Bt11           | Bt11-F<br>Bt11-R   | (ROX)GCCTCGTGATACGCCTATTTTT<br>CAAAAATCCAAGAATCCCTCCA     | 163                         | Ministry of Agriculture<br>Announcement<br>No. 2122-14-2014                    |
| 6   | Bt176          | Bt176-F<br>Bt176-R | (ROX)TTCAAGCACGGGAACTGGC<br>GAGCGAGAACACGAGAAGAGG         | 270                         | Ministry of Agriculture<br>Announcement<br>No. 2122-15-2014                    |
| 7   | Bt506          | Bt506-F<br>Bt506-R | (ROX)GGACCCTTTCCTCCACCCTTTA<br>CCAATTACCATATCCGCGTGCC     | 231                         | Ministry of Agriculture and<br>Rural Affairs<br>Announcement<br>No. 111-7-2018 |
| 8   | BVLA43<br>0101 | 101-F<br>101-R     | (ROX)AATTGCGTTGCGCTCACT<br>GCAACACATGGGCACATACC           | 152                         | Ministry of Agriculture<br>Announcement                                        |

No. 1782-11-2012

|    |             |                            |                                                             |     |                                                                                    |
|----|-------------|----------------------------|-------------------------------------------------------------|-----|------------------------------------------------------------------------------------|
| 9  | C0010.1.1   | C0010.1.1-F<br>C0010.1.1-R | (FAM)AGGAGGCCCTTGTTTGTGA<br>ACGGCGAGTTCTGTTAGGTC            | 239 | Ministry of<br>Agriculture and<br>Rural Affairs<br>Announcement<br>No. 111-8-2018  |
| 10 | C0010.1.3   | C0010.1.3-F<br>C0010.1.3-R | (FAM)CTCTATAGTAAATGGGTTCGC<br>CGCAAAC TAGGATAAATTATCGC      | 198 | Ministry of<br>Agriculture and<br>Rural Affairs<br>Announcement<br>No. 323-14-2020 |
| 11 | C0010.3.1   | C0010.3.1-F<br>C0010.3.1-R | (ROX)CGTCAACTTAAC TTGAGTGC<br>TCAGTCTAACACCGCAAT            | 292 | Ministry of<br>Agriculture and<br>Rural Affairs<br>Announcement<br>No. 323-15-2020 |
| 12 | C0030.2.5   | C0030.2.5-F<br>C0030.2.5-R | (ROX)CCAGTCCTGATTATCAGTCATT<br>TAAAAACGTCCGCAATGTGTTATTA    | 296 | Ministry of<br>Agriculture and<br>Rural Affairs<br>Announcement<br>No. 323-18-2020 |
| 13 | C0030.3.5   | C0030.3.5-F<br>C0030.3.5-R | (FAM)CTCGTCAGCCAACACCGTGA<br>CCCCGCCTCATCTTGATCCA           | 202 | Ministry of<br>Agriculture<br>Announcement<br>No. 2630-9-2017                      |
| 14 | CC-2        | CC-2-F<br>CC-2-R           | (FAM)GTTTATGGTTCTCCCCGTGTA<br>TCGGGGGATCTGGATTTTAGT         | 115 | Ministry of<br>Agriculture and<br>Rural Affairs<br>Announcement<br>No. 323-3-2020  |
| 15 | DAS-40278-9 | 40278-F<br>40278-R         | (ROX)CCATTCAGGAGACCTCGCTTG<br>CGAGCTTCAATCACTTTATGG         | 238 | Ministry of<br>Agriculture<br>Announcement<br>No. 2122-9-2014                      |
| 16 | GA21        | GA21-F<br>GA21-R           | (ROX)CTTATCGTTATGCTATTTGCAACTT<br>TGGCTCGCGATCCTCCTCGCGTTTC | 112 | Ministry of<br>Agriculture                                                         |

|    |                  |                                              |                                                                  |     |                                                                                    |
|----|------------------|----------------------------------------------|------------------------------------------------------------------|-----|------------------------------------------------------------------------------------|
|    |                  |                                              |                                                                  |     | Announcement<br>No. 869-12-2007                                                    |
| 17 | G1105E-<br>823C  | G1105E-<br>823C-F<br><br>G1105E-<br>823C-R   | (ROX)CCGAATTAATTCGGCGTTAATTC<br><br>AATTGATAGATCCCGACATAAAC      | 203 | Ministry of<br>Agriculture and<br>Rural Affairs<br>Announcement<br>No. 323-12-2020 |
| 18 | GH5112<br>E-117C | GH5112E-<br>117C-F<br><br>GH5112E-<br>117C-R | (ROX)ACCAGCACCAGGTCCGAGTTGAGA<br><br>CCCAGGTACATTAAAAACGTCCGC    | 179 | Ministry of<br>Agriculture and<br>Rural Affairs<br>Announcement<br>No. 323-16-2020 |
| 19 | MIR162           | MIR162-F<br><br>MIR162-R                     | (FAM)CCCGGGTCTAGACAATTCAGT<br><br>GCCCAGTAAACAACCTACCACAAG       | 97  | Ministry of<br>Agriculture<br>Announcement<br>No. 2031-6-2013                      |
| 20 | MIR604           | MIR604-F<br><br>MIR604-R                     | (ROX)TCGCGCGCGGTGTCATCTATG<br><br>CGCGACACACCTCGTTAGTTAA         | 142 | Ministry of<br>Agriculture<br>Announcement<br>No. 1485-16-2010                     |
| 21 | MON810           | MON810-F<br><br>MON810-R                     | (FAM)ACCTCGAGATTTACCTGATCCG<br><br>TGCTGCAGGTGGTCTTACATC         | 326 | Ministry of<br>Agriculture<br>Announcement<br>No. 2122-16-2014                     |
| 22 | MON863           | MON863-F<br><br>MON863-R                     | (FAM)GCACTCAAAGACCTGGCGAATGA<br><br>CCATCTTTGGGACCACTGTCTG       | 411 | Ministry of<br>Agriculture<br>Announcement<br>No. 869-10-2007                      |
| 23 | MON874<br>27     | MON87427<br><br>MON87427                     | (FAM)GAAACGGTCGGGTCAAATGTAGAA<br><br>CGTCGAAATAAAGATTTCCGAATTAGA | 291 | Ministry of<br>Agriculture<br>Announcement<br>No. 2630-6-2017                      |
| 24 | MON880<br>17     | MON88017-F<br><br>MON88017-R                 | (ROX)TTGTCCTGAACCCCTAAAATCC<br><br>CCCGGACATGAAGCCATTTA          | 199 | Ministry of<br>Agriculture<br>Announcement<br>No. 1485-15-2010                     |

|    |                             |                                        |                                                             |     |                                                                |
|----|-----------------------------|----------------------------------------|-------------------------------------------------------------|-----|----------------------------------------------------------------|
| 25 | MON890<br>34                | MON89034-F<br>MON89034-R               | (FAM)GCTGCTACTACTATCAAGCCAATA<br>TGCTTTCGCCTATAAATACGAC     | 207 | Ministry of<br>Agriculture<br>Announcement<br>No. 1861-4-2012  |
| 26 | T25                         | T25-F<br>T25-R                         | (FAM)CAGCGACAATGGCGGAACGACTCAA<br>CCTTTCCTTTATCGCAATGATGGCA | 255 | Ministry of<br>Agriculture<br>Announcement<br>No. 869-14-2007  |
| 27 | TC1507                      | TC1507-F<br>TC1507-R                   | (FAM)CTTGTGGTGTTTGTGGCTCT<br>TGGCTCCTCCTTCGTATGT            | 279 | Ministry of<br>Agriculture<br>Announcement<br>No. 869-7-2007   |
| 28 | VCO-<br>01981-5             | VCO-01981-<br>5-F<br>VCO-01981-<br>5-R | (ROX)CCACTGAACGTCACCAAGAA<br>CCGTTGCTATACCGTTTGCT           | 209 | Ministry of<br>Agriculture<br>Announcement<br>No. 2630-11-2017 |
| 29 | SK12-5                      | SK12-5F<br>SK12-5R                     | (ROX)CAACGTCGTGACTGGGAAAA<br>TGGAAGACAAGTTCTACGGGCT         | 256 | Ministry of<br>Agriculture<br>Announcement<br>No. 2259-12-2015 |
| 30 | <i>zSSIb</i>                | <i>zSSIb</i> -F<br><i>zSSIb</i> -R     | CTCCCAATCCTTTGACATCTGC<br>(FAM)TCGATTTCTCTCTTGGTGACAGG      | 151 | Ministry of<br>Agriculture<br>Announcement<br>No. 1861-3-2012  |
| 31 | <i>P-CaMV</i><br><i>35S</i> | 35S-F<br>35S-R                         | (FAM)GCTCCTACAAATGCCATCATTGC<br>GATAGTGGGATTGTGCGTCATCCC    | 195 | Ministry of<br>Agriculture<br>Announcement<br>No. 1782-3-2012  |
| 32 | <i>T-NOS</i>                | NOS-F<br>NOS-R                         | (FAM)GAATCCTGTTGCCGGTCTTG<br>TTATCCTAGTTTGCGCGCTA           | 180 | Ministry of<br>Agriculture<br>Announcement<br>No. 1782-3-2012  |
| 33 | <i>pat</i>                  | <i>pat</i> -F<br><i>pat</i> -R         | (ROX)GAAGGCTAGGAACGCTTACGA<br>CCAAAAACCAACATCATGCCA         | 262 | Ministry of<br>Agriculture<br>Announcement                     |

---

Table S2. Information on amplified fragments based on capillary electrophoresis

| No. | Target            | Fluorescent dyes | Target<br>length<br>(bp) | Observed<br>length<br>(bp) | Difference |
|-----|-------------------|------------------|--------------------------|----------------------------|------------|
| 1   | 3272              | FAM              | 221                      | 219                        | -2         |
| 2   | 4114              | FAM              | 296                      | 294                        | -2         |
| 3   | 5307              | ROX              | 250                      | 250                        | 0          |
| 4   | 59122             | FAM              | 273                      | 271                        | -2         |
| 5   | Bt11              | ROX              | 163                      | 165                        | 2          |
| 6   | Bt176             | ROX              | 270                      | 270                        | 0          |
| 7   | Bt506             | ROX              | 231                      | 231                        | 0          |
| 8   | BVLA430101        | ROX              | 152                      | 154                        | 2          |
| 9   | C0010.1.1         | FAM              | 239                      | 238                        | -1         |
| 10  | C0010.1.3         | FAM              | 198                      | 198                        | 0          |
| 11  | C0010.3.1         | ROX              | 292                      | 292                        | 0          |
| 12  | C0030.2.5         | ROX              | 296                      | 297                        | 1          |
| 13  | C0030.3.5         | FAM              | 202                      | 201                        | -1         |
| 14  | CC-2              | FAM              | 115                      | 115                        | 0          |
| 15  | DAS-40278-9       | ROX              | 238                      | 237                        | -1         |
| 16  | GA21              | ROX              | 112                      | 113                        | 1          |
| 17  | G1105E-823C       | ROX              | 203                      | 206                        | 3          |
| 18  | GH5112E-117C      | ROX              | 179                      | 182                        | 3          |
| 19  | MIR162            | FAM              | 97                       | 96                         | -1         |
| 20  | MIR604            | ROX              | 142                      | 142                        | 0          |
| 21  | MON810            | FAM              | 326                      | 325                        | -1         |
| 22  | MON863            | FAM              | 411                      | 410                        | -1         |
| 23  | MON87427          | FAM              | 291                      | 288                        | -3         |
| 24  | MON88017          | ROX              | 199                      | 199                        | 0          |
| 25  | MON89034          | FAM              | 207                      | 204                        | -3         |
| 26  | T25               | FAM              | 255                      | 253                        | -2         |
| 27  | TC1507            | FAM              | 279                      | 277                        | -2         |
| 28  | VCO-01981-5       | ROX              | 209                      | 209                        | 0          |
| 29  | SK12-5            | ROX              | 256                      | 256                        | 0          |
| 30  | <i>zSSIb</i>      | FAM              | 151                      | 152                        | 1          |
| 31  | <i>P-CaMV 35S</i> | FAM              | 195                      | 193                        | -2         |
| 32  | <i>T-nos</i>      | FAM              | 180                      | 180                        | 0          |
| 33  | <i>pat</i>        | ROX              | 262                      | 264                        | 2          |
